# Supplementary material for: Tumour-derived exosomal lncRNA-SOX2OT promotes bone metastasis of non-small cell lung cancer by targeting the miRNA-194-5p/RAC1 signalling axis in osteoclasts
Source: PubMed Central journal article supplement (PMC8253828; doi:10.1038/s41419-021-03928-w), 2021-07-02

**Figure S2**

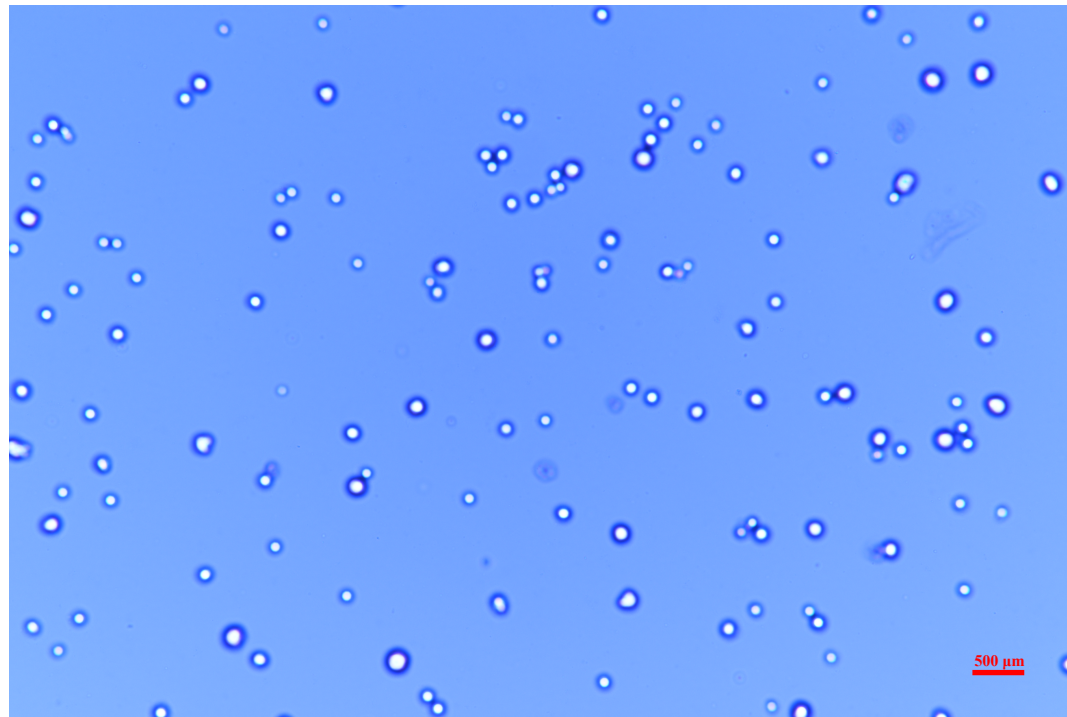

Supplement: 41419_2021_3928_MOESM3_ESM.pdf [file 41419_2021_3928_MOESM3_ESM.pdf]
